# Supplementary material for: A high-density SNP genetic map consisting of a complete set of homologous groups in autohexaploid sweetpotato (Ipomoea batatas)
Source: PubMed Central journal article supplement (PMC5345071; doi:10.1038/srep44207), 2017-03-10
Supplement: srep44207-s1.pdf [file srep44207-s1.pdf]

*Supplementary information*

**A high-density SNP genetic map consisting of a complete set of homologous groups in autohexaploid sweetpotato (*Ipomoea batatas*)**

Kenta Shirasawa<sup>1\*</sup>, Masaru Tanaka<sup>2</sup>, Yasuhiro Takahata<sup>2</sup>, Daifu Ma<sup>3</sup>, Qinghe Cao<sup>3</sup>, Qingchang Liu<sup>4</sup>, Hong Zhai<sup>4</sup>, Sang-Soo Kwak<sup>5</sup>, Jae Cheol Jeong<sup>5</sup>, Ung-Han Yoon<sup>6</sup>, Hyeong-Un Lee<sup>6</sup>, Hideki Hirakawa<sup>1</sup>, and Sachiko Isobe<sup>1</sup>

<sup>1</sup>Kazusa DNA Research Institute, Japan, <sup>2</sup>Kyushu Okinawa Agricultural Research Center, National Agriculture and Food Research Organization, Japan, <sup>3</sup>Chinese Academy of Agricultural Sciences, China, <sup>4</sup>China Agricultural University, China, <sup>5</sup>Korea Research Institute of Bioscience & Biotechnology, South Korea, and <sup>6</sup>Rural Development Administration, South Korea

**Supplementary Table S1** Theoretical segregation ratios for the F1 and S1 progeny of autohexaploid species.

**Supplementary Table S2** Number of ddRAD-Seq reads and their mapping rates for the S1 mapping progenies.

**Supplementary Table S3** Genetic map based on the Xushu18 S1 population.

**Supplementary Table S4** Number of sequence variations for each sequence ontology.

**Supplementary Table S5** Number of SNPs mapped onto *I. trifida* scaffolds (ITR\_r1.0).

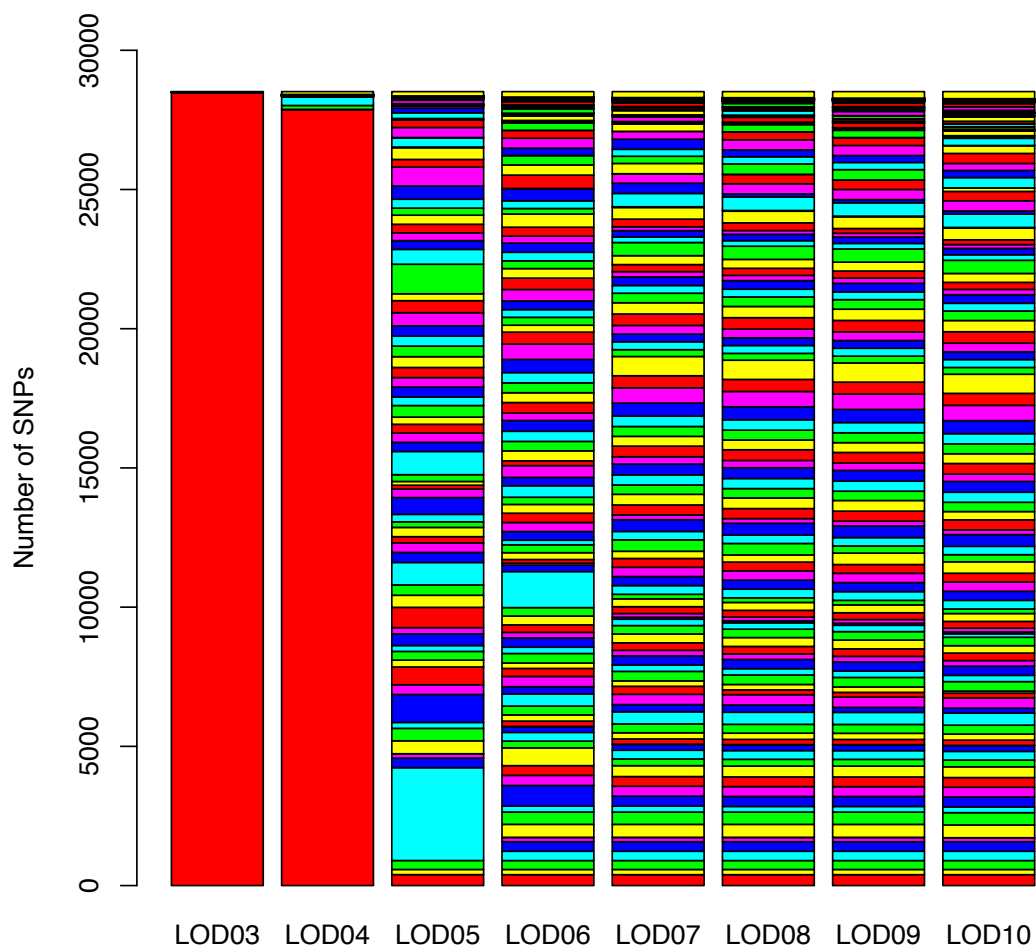

**Supplementary Figure S1** Grouping of SNPs with different LOD values using the OneMap program.
